# Supplementary material for: Abscisic acid implicated in differential plant responses of Phaseolus vulgaris during endophytic colonization by Metarhizium and pathogenic colonization by Fusarium
Source: PubMed Central journal article supplement (PMC8167117; doi:10.1038/s41598-021-90232-4), 2021-05-31
Supplement: 41598_2021_90232_MOESM1_ESM.pdf [file 41598_2021_90232_MOESM1_ESM.pdf]

**Abscisic acid implicated in differential plant responses of  
*Phaseolus vulgaris* during endophytic colonization by  
*Metarhizium* and pathogenic colonization by *Fusarium***

Shasha Hu and Michael J. Bidochka\*

Department of Biological Sciences, Brock University, St. Catharines, ON Canada L2S

3A1

\*Address correspondence to

Email: [mbidochka@brocku.ca](mailto:mbidochka@brocku.ca)

Telephone: +1 905-688-5550

## **Supplementary Information**

**Supplementary Figure S1.** The concentration of important plant hormones during endophytic or pathogenic colonization.

**Supplementary Figure S2.** Colony morphology and conidial production of *M. robertsii* and *F. solani* under different amount of ABA.

**Supplementary Figure S3.** Analysis of stomatal aperture during the exogenous application of ABA on bean leaves.

**Supplementary Figure S4.** Relative expression of genes involved in ABA biosynthetic pathway in bean leaves and roots.

**Supplementary Figure S5.** CFU of *M. robertsii* or *F. solani* in bean root homogenate after exogenous application of 25% ethanol.

**Supplementary Table S1.** Plant hormones tested in this study

**Supplementary Table S2.** Primer sequences of *Phaseolus vulgaris* used for RT-PCR analysis.

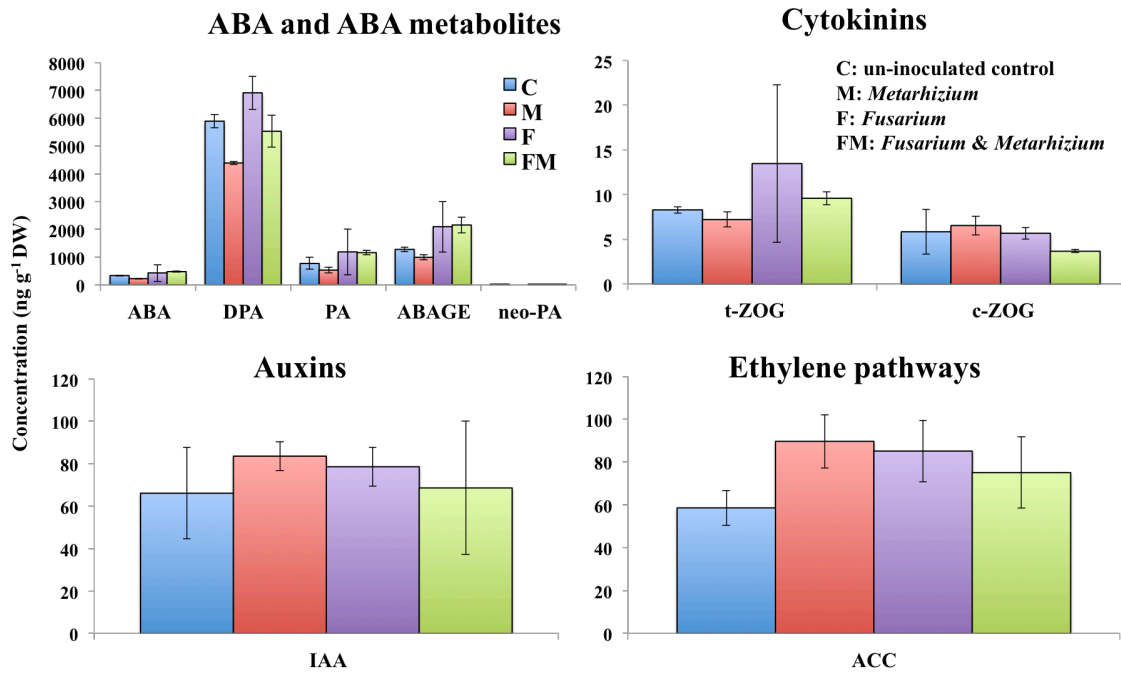

**Supplementary Figure S1. The concentration of important plant hormones during endophytic or pathogenic colonization.** *cis*-Abscisic acid (ABA), Dihydrophaseic acid (DPA), Phaseic acid (PA), Abscisic acid glucose ester (ABAGE), neo-PA (neo-Phaseic acid), (*trans*) zeatin-O-glucoside (*t*-ZOG), (*cis*) zeatin-O-glucoside (*c*-ZOG), indole-3-acetic acid (IAA), 1-aminocyclopropane-1-carboxylic acid (ACC).

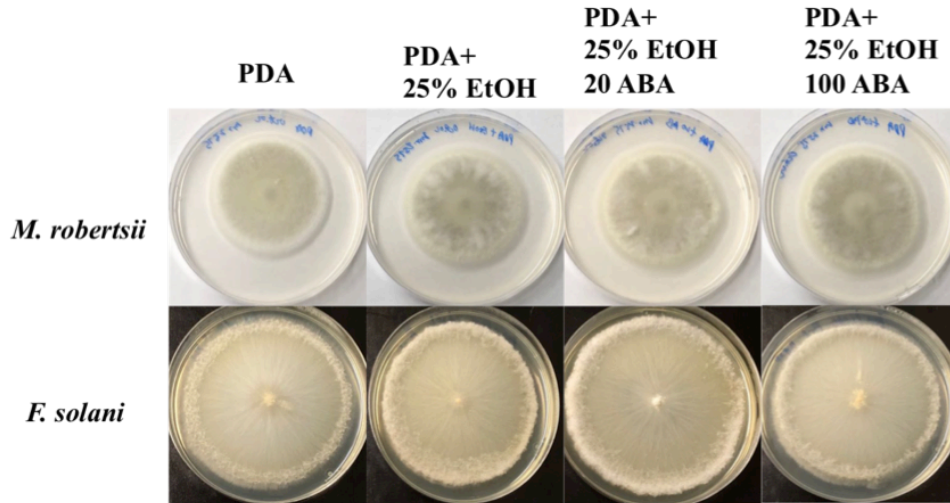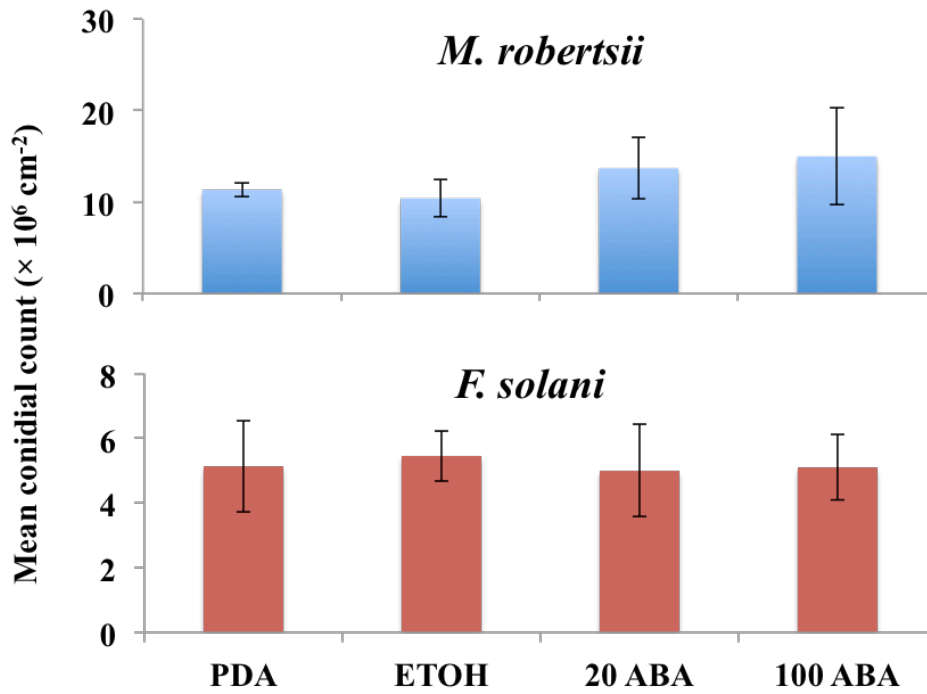

**Supplementary Figure S2. Colony morphology and conidial production of *M. robertsii* and *F. solani* under different amount of ABA.**

ABA, abscisic acid. X-axis represents values of ABA  $\mu\text{g}$  per PDA plate.

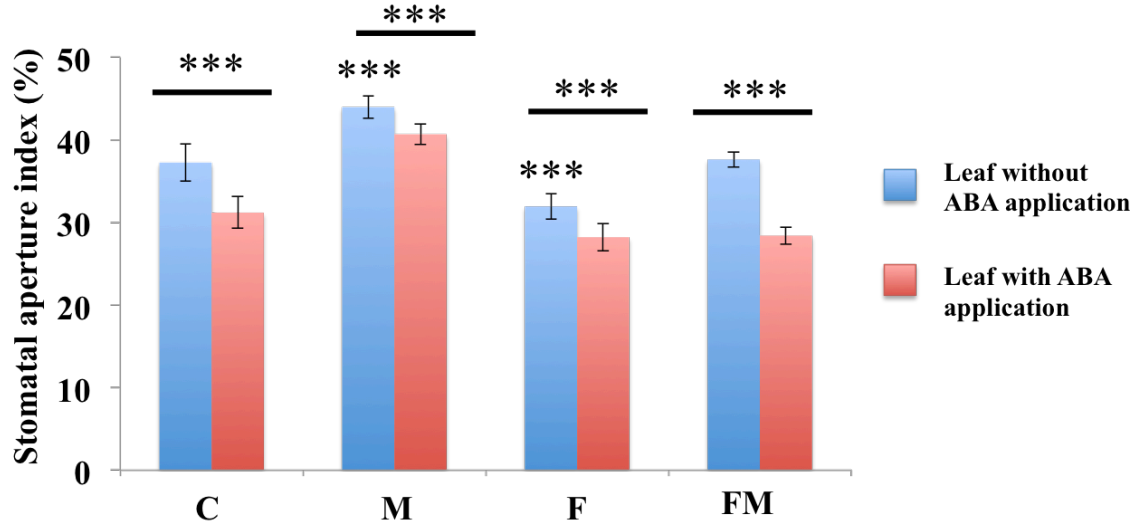

**Supplementary Figure S3. Analysis of stomatal aperture during the exogenous application of ABA on bean leaves.** The stomatal aperture index in the bean leaves after 14 days of un-inoculated control (C) and bean colonized by *M. robertsii* (M), *F. solani* (F), and *M. robertsii* together with *F. solani* (FM). Standard deviations are shown. Data were analyzed by one-way ANOVA with Fisher's least-significant difference (LSD) test. Statistical differences shown; \*  $P < 0.05$ ; \*\*  $P < 0.01$ ; \*\*\*  $P < 0.001$ . Asterisks alone indicate statistically significant differences relative to un-inoculated control. Asterisk above black line indicate the significant differences of stomatal aperture index with exogenous ABA application compared to that in corresponding plant without ABA application.

### Gene Expression in Bean Leaves

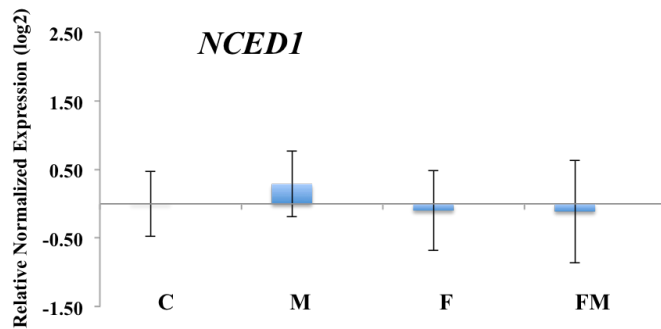

### Gene Expression in Bean Roots

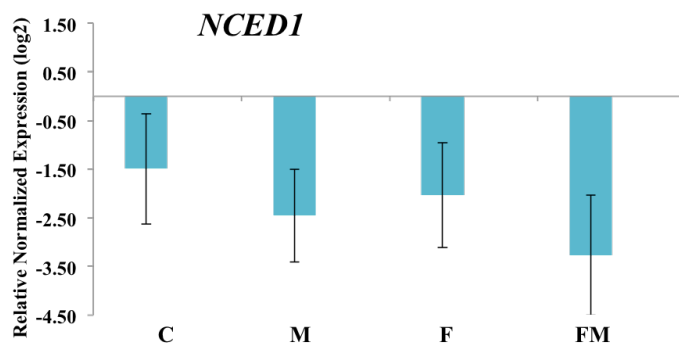

**Supplementary Figure S4. Relative expression of genes involved in ABA biosynthetic pathway in bean leaves and roots.** RNA was extracted at 14 days bean leaf and root in un-inoculated control (C), colonized by *M. robertsii* (M), *F. solani* (F), and *M. robertsii* together with *F. solani* (FM). For each gene, the expression level in un-inoculated control bean leaf was set to 1. Standard errors are shown. Figure Data were analyzed with standard t-test in Bio-Rad CFX Manager software. No statistical differences are shown nine-*cis* epoxy-carotenoid dioxygenases 1(NCED1).

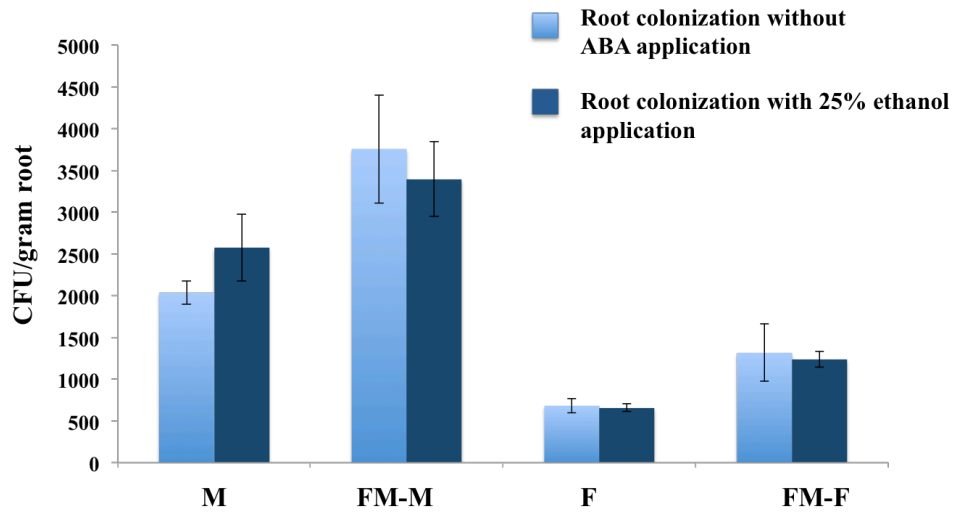

**Supplementary Figure S5. CFU of *M. robertsii* or *F. solani* in bean root homogenate after exogenous application of 25% ethanol. M: *M. robertsii*, F: *F. solani*, FM: *F. solani* and *M. robertsii* treatment group. Standard error bars are shown.**

**Supplementary Table S1 Plant hormones tested in this study**

| <b>Group</b>               | <b>Abbreviation</b>              | <b>Full Name</b>                     |
|----------------------------|----------------------------------|--------------------------------------|
| <b>ABA and metabolites</b> | ABA                              | <i>cis</i> -Abscisic acid            |
|                            | ABAGE                            | Abscisic acid glucose ester          |
|                            | DPA                              | Dihydrophaseic acid                  |
|                            | PA                               | Phaseic acid                         |
|                            | 7'OH-ABA                         | 7'-Hydroxy-abscisic acid             |
|                            | neo-PA                           | <i>neo</i> -Phaseic acid             |
|                            | <i>t</i> -ABA                    | <i>trans</i> -Abscisic acid          |
| <b>Auxins</b>              | IAA                              | Indole-3-acetic acid                 |
|                            | IAA-Asp                          | N-(Indole-3-yl-acetyl)-aspartic acid |
|                            | IAA-Glu                          | N-(Indole-3-yl-acetyl)-glutamic acid |
|                            | IAA-Ala                          | N-(Indole-3-yl-acetyl)-alanine       |
|                            | IAA-Leu                          | N-(Indole-3-yl-acetyl)-leucine       |
|                            | IBA                              | Indole-3-butyric acid                |
| <b>Cytokinins</b>          | <i>t</i> -ZOG                    | ( <i>trans</i> ) Zeatin-O-glucoside  |
|                            | <i>c</i> -ZOG                    | ( <i>cis</i> ) Zeatin-O-glucoside    |
|                            | <i>t</i> -Z                      | ( <i>trans</i> ) Zeatin              |
|                            | <i>c</i> -Z                      | ( <i>cis</i> ) Zeatin                |
|                            | dhZ                              | Dihydrozeatin                        |
|                            | <i>t</i> -ZR                     | ( <i>trans</i> ) Zeatin riboside     |
|                            | <i>c</i> -ZR                     | ( <i>cis</i> ) Zeatin riboside       |
|                            | dhZR                             | Dihydrozeatin riboside               |
|                            | iP                               | Isopentenyladenine                   |
|                            | iPR                              | Isopentenyladenosine                 |
|                            | KIN                              | Kinetin                              |
|                            | <b>Ethylene<br/>Gibberellins</b> | ACC                                  |
| GA1                        |                                  | Gibberellin 1                        |
| GA3                        |                                  | Gibberellin 3                        |
| GA4                        |                                  | Gibberellin 4                        |
| GA7                        |                                  | Gibberellin 7                        |
| GA8                        |                                  | Gibberellin 8                        |
| GA9                        |                                  | Gibberellin 9                        |
| GA19                       |                                  | Gibberellin 19                       |
| GA20                       |                                  | Gibberellin 20                       |
| GA24                       |                                  | Gibberellin 24                       |
| GA29                       |                                  | Gibberellin 29                       |
| GA34                       |                                  | Gibberellin 34                       |
| GA44                       |                                  | Gibberellin 44                       |
| GA51                       |                                  | Gibberellin 51                       |
| GA53                       |                                  | Gibberellin 53                       |



**Supplementary Table S2 Primers sequences of *Phaseolus vulgaris* used for RT-PCR**

**analysis**

| <b>Gene</b>       | <b>NCBI ID</b> | <b>Sequence</b> | <b>Size (bp)</b> | <b>Forward Sequence</b>     | <b>Reverse Sequence</b>         |
|-------------------|----------------|-----------------|------------------|-----------------------------|---------------------------------|
| <i>Act</i>        | XM_007162263   |                 | 126              | CACCGAGGCACCGC<br>TTAATC    | CGGCCACTAGCGTA<br>AAGGGAA       |
| <i>ERF1</i>       | XM_007144028   |                 | 161              | CGCTCTCAAGAGGA<br>AACACTCC  | TGAATCAGAAGGAG<br>GAGGGAAAT     |
| <i>ERF5</i>       | XM_007157197   |                 | 151              | GGCTCCAAGTGGAT<br>TGAGAAC   | TCAGAATCAGATAA<br>CTACAAAGCACAA |
| <i>HPL</i>        | XM_007149930   |                 | 153              | TCAAGGCTACATTT<br>GTATTTCCA | TGGTGCACATTTCTT<br>AGTAGCAA     |
| <i>PR1</i>        | XM_007154263   |                 | 98               | TGGTCCTAACGGAG<br>GATCAC    | TGGCTTTTCCAGCT<br>TTGAGT        |
| <i>PR2</i>        | XM_007154264   |                 | 246              | GTGAAGGACGCCGA<br>TAACAT    | ACTGAGTTTGGGGT<br>CGATTG        |
| <i>PR3</i>        | XM_007137247   |                 | 111              | TGGAGTTGGTTATG<br>GCAACAA   | ATTCTGATGGGATG<br>GCAGTGT       |
| <i>PR4</i>        | XM_007147114   |                 | 140              | CGCAGTGAGTG CAT<br>ATTGCT   | TGGTGCACATTTCTT<br>AGTAGCAA     |
| <i>NCED1</i>      | AF190462       |                 | 162              | CTCCTTTTCTACGCT<br>CGCAG    | GGTGGTTAAGTCGC<br>CGTTAG        |
| <i>PvCYP707A1</i> | DQ352541       |                 | 111              | GCCTTTTGGCAGTG<br>GGATTCAT  | GCACCCACAACAG<br>ACCACCT        |
| <i>PvCYP707A3</i> | DQ352543       |                 | 121              | AGACTACCACACTC<br>GCCTCA    | GCCATCACCCCAAG<br>AGTTCA        |
